# Supplementary material for: The Effect of Different Optical Clearing Agents on the Attenuation Coefficient and Epidermal Thickness of Human Skin Assessed by Optical Coherence Tomography
Source: MDPI journal article supplement (doi:10.3390/app12168277), 2022-08-19
Supplement: s1 [file s1]

The effect of different optical clearing agents on the attenuation coefficient and epidermal thickness of human skin assessed by optical coherence tomography

## Supplementary information

The following tables are discussed in the manuscript.

**Table S1.** Mean  $\mu$ OCT values with standard deviation (SD) estimated by the iterative analysis of four OCT image ROIs at time points  $t_1$  and  $t_2$ .

|             | $t_1$         | $t_2$         |
|-------------|---------------|---------------|
| Non-treated | $4.1 \pm 1.0$ | NA            |
| PG          | $3.6 \pm 1.2$ | $3.2 \pm 0.9$ |
| PGOA        | $3.7 \pm 0.5$ | $2.3 \pm 0.4$ |
| V           | $3.2 \pm 0.5$ | $3.8 \pm 0.7$ |
| LV          | $3.3 \pm 0.6$ | $3.6 \pm 0.7$ |

**Table S2.** Mean epidermal thickness values with SD estimated by the iterative analysis of four OCT image ROIs at time points  $t_1$  and  $t_2$ .

|             | $t_1$          | $t_2$            |
|-------------|----------------|------------------|
| Non-treated | $79.2 \pm 4.5$ | NA               |
| PG          | $82.8 \pm 4.6$ | $105.7 \pm 18.7$ |
| PGOA        | $84.8 \pm 5.2$ | $98.1 \pm 7.7$   |
| V           | $80.5 \pm 5.7$ | $91.5 \pm 10.4$  |
| LV          | $85.5 \pm 5.6$ | $93.6 \pm 5.3$   |
